# Supplementary material
Source: PubMed Central journal article supplement (PMC3890888)
Supplement: 1311249111_pnas.201311249SI.pdf [file 1311249111_pnas.201311249SI.pdf]

# Supporting Information

Wang et al. 10.1073/pnas.1311249111

## SI Materials and Methods

**Cell Culture and Transfection.** Michigan Cancer Foundation (MCF)-7, HeLa-S3, HEK293T, human MDA-MB-231 breast adenocarcinoma, and human MDA-MB-435 breast carcinoma cells were cultured in DMEM with 10% (vol/vol) heat-inactivated FBS and 1 mM sodium pyruvate and 1% nonessential amino acid at 37 °C in a 5% (vol/vol) CO<sub>2</sub>/95% (vol/vol) air incubator. Hypoxia-cultured cells (1% O<sub>2</sub>) were incubated in a modular incubator chamber flushed with 1% O<sub>2</sub> /5% (vol/vol) CO<sub>2</sub>/balance N<sub>2</sub> and incubated at 37 °C. Transfection of cells was performed by using Lipofectamine 2000 (Invitrogen) according to the manufacturer's protocol. Cells were harvested 24 h posttransfection and washed in PBS for further analysis.

**Establishments of Jumonji Domain-Containing Dioxygenase (JMJD5)-Expressing and JMJD5-Knockdown Cell Lines.** For establishment of a stable JMJD5-expressing HeLaS3 cell line, pcDNA3-JMJD5 transfected cells were selected in G418 (800 µg/mL)-containing medium for 2 wk. The G418-resistant colonies were chosen, amplified, and evaluated the expression of Flag-JMJD5 by Western blotting with monoclonal antibody against Flag. For establishment of JMJD5-knockdown MCF-7 cell lines, the lentivirus-infected [shLKO (an empty lentiviral vector) or shJMJD5 constructs] MCF-7 cells were selected in puromycin (3 µg/mL)-containing media for 2 wk. The expression levels of JMJD5 of the puromycin-resistant MCF-7 cells were further evaluated by Western blotting. To down-regulate the endogenous pyruvate kinase muscle isozyme (PKM)2 expression, transfection of the siRNA-PKM2 (Santa Cruz) into MCF-7 cells was performed by using Lipofectamine RNAi-MAX (Invitrogen) according to the manufacturer's protocol. Cells were harvested 48 h posttransfection, and the expression levels of PKM2 were evaluated by Western blotting.

**Plasmids.** PCR-amplified human JMJD5 was cloned into pcDNA3.1-Flag as described previously (1). Full-length construct of pcDNA-HA-PKM2 was a gift from Dr. Zhimin Lu (The University of Texas, MD Anderson Cancer Center). (2). The hypoxia-inducible factor (HIF)-1 $\alpha$  reporter that contains hypoxia-response elements (HREs) fused with a firefly luciferase (pHRE-FLuc) (3) was purchased from Addgene. Lentiviral vectors pLKO-Control and pLKO-shJMJD5 were used as described previously (1). The N- and C-terminal-truncated constructs of PKM2 and JMJD5 were generated from the full-length counterparts by PCR with specific primers (listed in Tables S1 and S2) and inserted into pcDNA3.1-HA and pcDNA3.1-Flag, respectively, yielding HA-PKM2 and Flag-JMJD5 truncation mutants.

**Antibodies.** Rabbit anti-PKM2, anti-GAPDH, anti-PCNA, and anti-HIF-1 $\alpha$  antibodies were purchased from Cell Signaling Technology. Mouse monoclonal antibody anti-HIF-1 $\alpha$  [chromatin immunoprecipitation (ChIP)-grade] assay was purchased from Abcam. Mouse monoclonal antibody anti-PKM2 and mouse IgG were purchased from GeneTex. Mouse monoclonal antibodies recognizing Flag, His, HA, GST, and  $\beta$ -actin were purchased from Sigma. The homemade rabbit anti-JMJD5 antibody was raised against a full length of recombinant PKM2. Rabbit preimmune serum was collected before immunization.

**Lentivirus Production.** HEK293T cells were seeded onto 10-cm culture dishes 1 d before transfection and replaced with DMEM supplemented with 1% FBS antibiotics-free medium for 30 min before transfection. Recombinant lentivirus was generated

by transfection with lentiviral transducing vector encoding shLKO or shJMJD5 and packaging vectors pMD.G (2.5 mg) and pCMVR8.91 (7.5 mg) in HEK293T cells. After 48 h, virus particles in the medium were harvested, filtered through a 0.45-mm syringe-driven filter (Millipore), and transduced into MCF-7 cells.

**Liquid Chromatography-Tandem MS and Data Process.** Gel slices of proteins were further treated by in-gel digestion (4). Briefly, samples were reduced and alkylated by DTT/iodoacetamide. Each sample was digested with trypsin (wt/wt, 1:100; Promega) at 37 °C overnight. The digested peptides were injected into a MicrOTOF-Q (Bruker Daltonics) coupled to an Ultimate LC system (Thermo Fisher). Peak lists and Mascot generic format files were created using the DataAnalysis software 3.4 (Bruker Daltonics) and searched by Mascot search engine (v.2.2.03 Matrix Science) against Swiss-Prot database as previously described (5). The parameters were set as follows. The mass tolerance of the precursor and fragment ions were both 0.1 Da. Trypsin was set as the enzyme, and a maximum of three missed cleavages was allowed. Carbamidomethylation of cysteine was assumed as a fixed modification; acetylation at protein N-terminal, oxidation of methionine, and Gln change to pyro-Glu were assumed as variable modifications. After Mascot search, the resulting data were imported to the software Scaffold 3.0.7 (Proteome Software) to evaluate the information of peptide identifications and modifications. Protein identification is accepted if protein probability is >95% containing at least two peptides with peptide prophet algorithm probability of >95%.

**Immunoprecipitation, GST Pull-Down, and Western Blotting Assays.** Cell lysates used for immunoprecipitation (IP) assay were extracted in IP-lysis buffer [50 mM Tris-Cl (pH 7.4), 150 mM NaCl, 0.5% Nonidet P-40, 5% glycerol, 1 mM EDTA, and 1 $\times$  protease inhibitors (Thermo)] at 4 °C. Supernatants were clarified by centrifugation at top speed (16,000  $\times$  g) for 30 min at 4 °C. The supernatants (500 µL) were incubated with the corresponding antibodies (10 µg) as indicated and 50 µL of protein A/G Dynabeads (Invitrogen) at 4 °C overnight. The beads were washed three times with IP-lysis buffer. Elution was performed by incubating the washed beads in 30 µL of 7.5 mM Tris-HCl buffer (pH 8.0), 50 mM DTT, and 1 $\times$  SDS sample buffer (Bio-Rad) at 90 °C for 10 min. The input lysates and immunoprecipitates were separated by 5–15% SDS/PAGE and analyzed by light chromatography-tandem MS or Western blotting assay as described previously (6). Purified GST-JMJD5 fusion protein (20 µg) or GST control (20 µg) were mixed His-PKM2 fusion protein (20 µg) with 20 µL of preequilibrated GST-agarose (GE Healthcare) in IP-lysis buffer. The mixtures were incubated overnight at 4 °C with agitation and then washed three times with 400 µL of IP-lysis buffer before elution with 50 µL of 50 mM reduced glutathione (in 50 mM Tris-HCl, pH 8.0). Protein samples from total cell extracts, IP, GST pull down, and chemical cross-linking were separated by 10% SDS/PAGE, followed by Western blotting assay with corresponding antibodies as indicated.

**Confocal Microscopic Analysis.** MCF-7 and HeLaS3 cells grew on coverslips were fixed with 3.7% paraformaldehyde for 30 min and penetrated by treatment with blocking buffer (1 $\times$  PBS plus 4% normal donkey serum) containing 0.1% of Triton X-100 for 1 h. PKM2 and Flag-JMJD5 (for HeLa cells) were marked with rabbit anti-PKM2 (1:1,000) and mouse anti-Flag-tag (1:2,000),

respectively. Cell nuclei were stained with DAPI. Alexa-488–conjugated anti-rabbit (1:1,000) and Cy5-conjugated anti-mouse (1:1,000) IgGs were used as secondary antibodies. Cells were examined in a Zeiss LSM 780 laser-scanning microscope (1- $\mu$ m thickness) with a Plan-Apochromat 63 $\times$ /1.4 oil immersion objective. Images were analyzed using the line profile tool in the LSM 780 META ZEN 2011 software package (Carl Zeiss).

**Cell-Proliferation Assay.** Cells were seeded in six-well plates at a density of  $3 \times 10^5$  cells per well and incubated overnight. Cells were then shifted to either normoxic (20% O<sub>2</sub>) or hypoxic (1% O<sub>2</sub>) condition, and cell number was counted each day after the treatments. Data represent the means  $\pm$  SD of three independent experiments.

**Purification of GST-JMJD5 and 6XHis-PKM2.** GST, GST-JMJD5, or His-PKM2 protein expression was induced with 0.2 mM isopropyl  $\beta$ -D-1-thiogalactopyranoside from in *Escherichia coli* BL21 (Rosetta) harboring pGEX-4T1, pGEX4T1-JMJD5, or pET-28a-PKM2 in LB-ampicillin (100  $\mu$ g/mL) media at an OD of  $\sim$ 0.8. Proteins were expressed for at 16  $^{\circ}$ C for 16 h. Affinity purification of the recombinant proteins were carried out at 4  $^{\circ}$ C according to previously described procedures (7). The purified proteins were resuspended in Tris buffer (50 mM Tris-HCl, pH 7.4, 150 mM, 1 mM  $\beta$ -mercaptoethanol, 1 mM PMSF). Protein concentrations were measured using the Bradford method (Bio-Rad).

**Subcellular Fractionation.** Fractionation of nuclear and cytosolic extracts was performed by using NE-PER Nuclear and Cytoplasmic Extraction kit (Thermo Scientific) according to the manufacturer's instructions.

**Luciferase Activity Assay.** Cells were seeded onto 48-well plates, transfected with pHRE-Firefly luciferase reporter (3), internal control reporter pTK (Thymidine kinase)-Renilla luciferase (Promega), pcDNA3.1-HA, pcDNA3.1-HA-PKM2, pcDNA3.1-HA-PKM2 (R399E), pcDNA3.1-Flag-JMJD5, or siRNA vector targeting PKM2 and exposed to 20% or 1% O<sub>2</sub> for 24 h. Firefly and Renilla luciferase activities were determined using the Dual-Luciferase Assay System (Promega).

**ChIP Assay.** ChIP assays were performed by using ChIP Assay Kit (Magna ChIPG assay kit; Millipore). Briefly,  $8 \times 10^6$  MCF-7 (LKO) or MCF-7 shJMJD5 cells were cross-linked with 1% formaldehyde for 20 min and then quenched in 0.125 M glycine for 30 min. The cell lysates were sonicated and subjected to IP using antibodies against JMJD5 (homemade rabbit polyclonal antibody), PKM2 (GeneTex, mouse monoclonal antibody), and HIF-1 $\alpha$  (mouse monoclonal antibody; Abcam). The precipitated DNAs were analyzed and quantified by using SYBR Green Real-time PCR analysis (Applied Biosystems StepOne). Primer sequences are listed in Tables S1 and S2. Fold enrichment was calculated based on threshold cycle (Ct) as  $2^{-\Delta(\Delta Ct)}$ , where  $\Delta Ct = Ct (IP) - Ct (input)$  and  $\Delta(\Delta Ct) = \Delta Ct (antibody) - \Delta Ct (IgG)$ .

**Re-ChIP.** MCF-7 cells cultured in DMEM supplemented with 10% FCS were cotransfected with human Flag-JMJD5 and HA-PKM2 followed by exposure to hypoxia for 24 h. Chromatin obtained from  $\sim 8 \times 10^7$  MCF-7 cells was cross-linked with 1% formaldehyde for 30 min and then quenched in 0.125 M glycine for 30 min. Re-ChIP was conducted according to the manufacturer's protocols with mild modification. ChIP assays were conducted according to the manufacturer's instruction (Magna ChIPG assay kit, Millipore) with antibody against Flag (Sigma) or HA (Santa Cruz Biotechnology) as indicated. The precipitated DNAs were analyzed and quantified by using SYBR Green Real-time PCR analysis (Applied Biosystems StepOne). Primer sequences are listed in Tables S1 and S2. Fold enrichment was

calculated based on Ct as  $2^{-\Delta(\Delta Ct)}$ , where  $\Delta Ct = Ct (IP) - Ct (Input)$  and  $\Delta(\Delta Ct) = \Delta Ct (Antibody) - \Delta Ct (IgG)$ . PCR products designed to amplify regions specific to the human *LDHA* promoters were analyzed on 1.8% (wt/vol) agarose/Tris-acetate-EDTA gels with ethidium-bromide stain.

**Quantitative Real-Time PCR.** Total RNAs were extracted with TRIzol (Invitrogen) reagent, and the cDNAs were prepared using the SuperScript First-strand cDNA Synthesis Kit (Invitrogen). Real-time quantitative (qRT)-PCR analysis was performed with ABI SYBR Green Master (ABI) using the 7500 Fast Real-Time PCR System (Applied Biosystems). Data were normalized to the expression of *GAPDH*. Quantitative PCR primers are listed in Tables S1 and S2.

**Surface Plasmon Resonance Assay.** Purified His-PKM2 and Flag-JMJD5 proteins were resuspended in sodium phosphate buffer (pH 7.3). The automated Biacore-T100 (GE Healthcare) instrument was used for measuring JMJD5-PKM2 interaction. For immobilizing GST-JMJD5 on a sensor chip by amine coupling, according to the software wizards for Biacore T100, the carboxylated dextran CM5 sensor chip was activated by treatment with 1:1 (vol/vol) mixture of 50 mM NHS and 200 mM ethyl(dimethylaminopropyl) carbodiimide, followed by passing through a 50  $\mu$ g/mL of GST-JMJD5 protein in 50 mM sodium acetate buffer (pH 5.0). The immobilization process was then blocked by injection of 1 M ethanolamine-HCl (pH 8.5) at a flow rate of 5  $\mu$ L/min. The binding and kinetic assays were carried out in 100 mM sodium phosphate buffer (pH 7.3) containing 100 mM NaCl at a flow rate of 30  $\mu$ L/min, and contact time was 250 s. The concentrations of PKM2 (analyte) were used ranging from 0.195 to 100  $\mu$ M. Dissociation and dissociation curves were monitored for 550 s. Immobilized JMJD5 protein was regenerated with an injection of 100 mM sodium phosphate (pH 7.3) containing 1 M NaCl for 30 s. All experiments were conducted at 25  $^{\circ}$ C. Sensograms were obtained and analyzed with Biacore T100 evaluation software.

**In Vitro PKM2 Activity Assay.** Purified His<sub>6</sub>-PKM2 (10  $\mu$ M) and GST-JMJD5 (10  $\mu$ M) proteins were resuspended in sodium phosphate buffer (pH 7.3). For monitoring the inhibitory effect of GST-JMJD5 on His-PKM2 activity, PKM2 (10 nM) was co-incubated with various concentrations of GST-JMJD5 (0–1,500 nM). The PKM2 activities were measured with a colorimetric-based pyruvate kinase activity assay kit (BioVision) according to the manufacturer's protocol.

**Glucose Uptake Assay.** MCF-7 cells transduced with lentivirus encoding shLKO or shJMJD5 (LKO and shJMJD5 cell lines, respectively) were cultured in glucose-free DMEM for 24 h and then incubated with high-glucose DMEM for 1 h. The intracellular glucose was measured with a fluorescence-based glucose assay kit (BioVision,) according to the manufacturer's protocol.

**Lactate Production Assay.** MCF-7 cells transduced with lentivirus encoding shLKO or shJMJD5 (LKO and shJMJD5 cell lines, respectively) were incubated with FBS-free DMEM for 1 h. The extracellular lactate was measured in the medium with a fluorescence-based lactate assay kit (BioVision) according to the manufacturer's protocol.

**Statistical Analysis.** Data were expressed as means  $\pm$  SD. The significance of difference was examined by Student *t* test (two-tailed).  $P < 0.05$  was considered to be significant.

**Chemical Cross-Linking Assay.** HEK293T cells that cotransfected HA-PKM2 plus Flag-JMJD5, HA-PKM2 plus Flag-JMJD5 $\Delta$ N80, HA-PKM2 alone, or Flag-JMJD5 alone were lysed with sodium





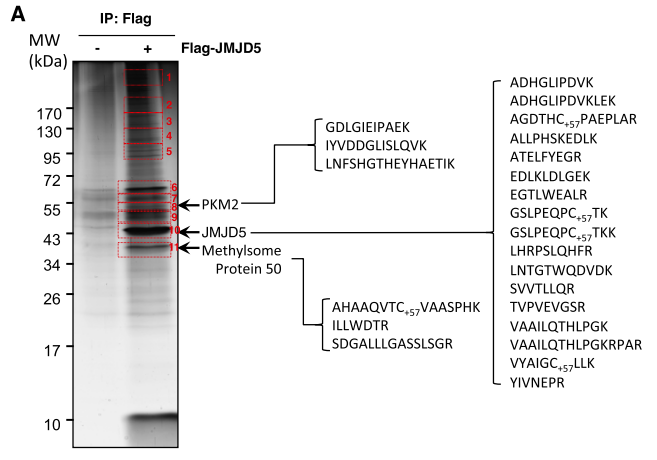

**B** Supplemental Information: Fig. S3B. Proteins and peptides identified from Fig. 2A (left figure) by in-gel digestion. We cut 11 band slices from the lane of Flag-JMD5 and also in the lane of Flag control. As the results showed, we identified 20 proteins from 4 bands which were differentially expressed in the lane of JMD5 transfection when comparing to control.

| Band | Protein name                                      | Protein ID details                                                                                                                                                                    | Protein size (kDa) | Protein MW (kDa) | Peptide sequence | Mass (Da) | Charge (z) | Modifications identified by spectrometry                | Actual protein (pMoles) | Expected protein (pMoles) | Actual protein (pMoles) | Actual protein (pMoles) |
|------|---------------------------------------------------|---------------------------------------------------------------------------------------------------------------------------------------------------------------------------------------|--------------------|------------------|------------------|-----------|------------|---------------------------------------------------------|-------------------------|---------------------------|-------------------------|-------------------------|
| 1    | DNA-dependent protein kinase catalytic subunit    | Protein identification probability: 100.0%<br>Protein molecular weight: 86.262 kDa<br>Sequence coverage: 13.76(14.74)<br>Number of unique peptides: 1<br>Number of total peptides: 1  | 86.26              | 86.26            | YVDDGLISLQVK     | 416.367   | 2          |                                                         | 1.64000                 | 1                         | 0.0019                  | 0.0019                  |
|      | RE1-silencing transcription factor                | Protein identification probability: 100.0%<br>Protein molecular weight: 85.262 kDa<br>Sequence coverage: 35.128(30.01)<br>Number of unique peptides: 3<br>Number of total peptides: 4 | 85.26              | 85.26            | YVDDGLISLQVK     | 416.367   | 2          | 25 Cysteine(S-Methyl), Cysteine(S-Gly), Cysteine(S-Gly) | 1.24515                 | 1                         | 0.0012                  | 0.0012                  |
|      | Telomere-associated protein RFI1                  | Protein identification probability: 100.0%<br>Protein molecular weight: 82.262 kDa<br>Sequence coverage: 25.124(24.51)<br>Number of unique peptides: 1<br>Number of total peptides: 1 | 82.26              | 82.26            | YVDDGLISLQVK     | 416.367   | 2          |                                                         | 1.21390                 | 1                         | 0.0018                  | 0.0018                  |
|      | Heterogeneous nuclear ribonucleoprotein K         | Protein identification probability: 100.0%<br>Protein molecular weight: 81.262 kDa<br>Sequence coverage: 41.254(43.81)<br>Number of unique peptides: 2<br>Number of total peptides: 2 | 81.26              | 81.26            | YVDDGLISLQVK     | 416.367   | 2          |                                                         | 1.17462                 | 1                         | 0.0011                  | 0.0011                  |
|      | Non-POU domain-containing octamer-binding protein | Protein identification probability: 100.0%<br>Protein molecular weight: 80.262 kDa<br>Sequence coverage: 40.243(42.12)<br>Number of unique peptides: 1<br>Number of total peptides: 1 | 80.26              | 80.26            | YVDDGLISLQVK     | 416.367   | 2          |                                                         | 1.16544                 | 1                         | 0.0011                  | 0.0011                  |
|      | Pyruvate kinase isozymes M1/M2                    | Protein identification probability: 100.0%<br>Protein molecular weight: 80.262 kDa<br>Sequence coverage: 40.243(42.12)<br>Number of unique peptides: 1<br>Number of total peptides: 1 | 80.26              | 80.26            | YVDDGLISLQVK     | 416.367   | 2          |                                                         | 1.16544                 | 1                         | 0.0012                  | 0.0012                  |
|      | U4U5 small nuclear ribonucleoprotein Prp31        | Protein identification probability: 100.0%<br>Protein molecular weight: 79.262 kDa<br>Sequence coverage: 12.246(12.42)<br>Number of unique peptides: 1<br>Number of total peptides: 1 | 79.26              | 79.26            | YVDDGLISLQVK     | 416.367   | 2          |                                                         | 1.15626                 | 1                         | 0.0017                  | 0.0017                  |
|      | 60S ribosomal protein L3                          | Protein identification probability: 100.0%<br>Protein molecular weight: 78.262 kDa<br>Sequence coverage: 41.254(43.81)<br>Number of unique peptides: 2<br>Number of total peptides: 2 | 78.26              | 78.26            | YVDDGLISLQVK     | 416.367   | 2          |                                                         | 1.14708                 | 1                         | 0.0018                  | 0.0018                  |
|      | Elongation factor 1-alpha 1                       | Protein identification probability: 100.0%<br>Protein molecular weight: 78.262 kDa<br>Sequence coverage: 41.254(43.81)<br>Number of unique peptides: 2<br>Number of total peptides: 2 | 78.26              | 78.26            | YVDDGLISLQVK     | 416.367   | 2          |                                                         | 1.13790                 | 1                         | 0.0018                  | 0.0018                  |
|      | Elongation factor 1-gamma                         | Protein identification probability: 100.0%<br>Protein molecular weight: 78.262 kDa<br>Sequence coverage: 41.254(43.81)<br>Number of unique peptides: 2<br>Number of total peptides: 2 | 78.26              | 78.26            | YVDDGLISLQVK     | 416.367   | 2          |                                                         | 1.12872                 | 1                         | 0.0017                  | 0.0017                  |
| 10   | Eukaryotic initiation factor 4A-III               | Protein identification probability: 100.0%<br>Protein molecular weight: 77.262 kDa<br>Sequence coverage: 41.254(43.81)<br>Number of unique peptides: 2<br>Number of total peptides: 2 | 77.26              | 77.26            | YVDDGLISLQVK     | 416.367   | 2          |                                                         | 1.11954                 | 1                         | 0.0018                  | 0.0018                  |
|      | JmjC domain-containing protein 5                  | Protein identification probability: 100.0%<br>Protein molecular weight: 76.262 kDa<br>Sequence coverage: 41.254(43.81)<br>Number of unique peptides: 2<br>Number of total peptides: 2 | 76.26              | 76.26            | YVDDGLISLQVK     | 416.367   | 2          |                                                         | 1.11036                 | 1                         | 0.0018                  | 0.0018                  |
|      | Serine/threonine-protein kinase 38                | Protein identification probability: 100.0%<br>Protein molecular weight: 75.262 kDa<br>Sequence coverage: 41.254(43.81)<br>Number of unique peptides: 2<br>Number of total peptides: 2 | 75.26              | 75.26            | YVDDGLISLQVK     | 416.367   | 2          |                                                         | 1.10118                 | 1                         | 0.0019                  | 0.0019                  |
|      | Actin, cytoplasmic 1 or 2                         | Protein identification probability: 100.0%<br>Protein molecular weight: 74.262 kDa<br>Sequence coverage: 41.254(43.81)<br>Number of unique peptides: 2<br>Number of total peptides: 2 | 74.26              | 74.26            | YVDDGLISLQVK     | 416.367   | 2          |                                                         | 1.09200                 | 1                         | 0.0019                  | 0.0019                  |
|      | Histone H1.2, 1.3 or 1.4                          | Protein identification probability: 100.0%<br>Protein molecular weight: 73.262 kDa<br>Sequence coverage: 41.254(43.81)<br>Number of unique peptides: 2<br>Number of total peptides: 2 | 73.26              | 73.26            | YVDDGLISLQVK     | 416.367   | 2          |                                                         | 1.08282                 | 1                         | 0.0019                  | 0.0019                  |
|      | Interleukin enhancer-binding factor 2             | Protein identification probability: 100.0%<br>Protein molecular weight: 72.262 kDa<br>Sequence coverage: 41.254(43.81)<br>Number of unique peptides: 2<br>Number of total peptides: 2 | 72.26              | 72.26            | YVDDGLISLQVK     | 416.367   | 2          |                                                         | 1.07364                 | 1                         | 0.0019                  | 0.0019                  |
|      | Methylosome protein 50                            | Protein identification probability: 100.0%<br>Protein molecular weight: 71.262 kDa<br>Sequence coverage: 41.254(43.81)<br>Number of unique peptides: 2<br>Number of total peptides: 2 | 71.26              | 71.26            | YVDDGLISLQVK     | 416.367   | 2          |                                                         | 1.06446                 | 1                         | 0.0019                  | 0.0019                  |
|      | Polyl(C)-binding protein 1                        | Protein identification probability: 100.0%<br>Protein molecular weight: 70.262 kDa<br>Sequence coverage: 41.254(43.81)<br>Number of unique peptides: 2<br>Number of total peptides: 2 | 70.26              | 70.26            | YVDDGLISLQVK     | 416.367   | 2          |                                                         | 1.05528                 | 1                         | 0.0019                  | 0.0019                  |
|      | Protein phosphatase 1B                            | Protein identification probability: 100.0%<br>Protein molecular weight: 69.262 kDa<br>Sequence coverage: 41.254(43.81)<br>Number of unique peptides: 2<br>Number of total peptides: 2 | 69.26              | 69.26            | YVDDGLISLQVK     | 416.367   | 2          |                                                         | 1.04610                 | 1                         | 0.0019                  | 0.0019                  |
|      | RC3 domain-containing protein 1                   | Protein identification probability: 100.0%<br>Protein molecular weight: 68.262 kDa<br>Sequence coverage: 41.254(43.81)<br>Number of unique peptides: 2<br>Number of total peptides: 2 | 68.26              | 68.26            | YVDDGLISLQVK     | 416.367   | 2          |                                                         | 1.03692                 | 1                         | 0.0019                  | 0.0019                  |

**Fig. S3.** Identification of PKM2 that interacts with JMD5 by mass spectrometric analysis. (A) Nuclear extracts were prepared from HeLa-Mock cells (denoted as "-") or HeLa-Flag-JMD5 (denoted as "+"), followed by IP with anti-Flag-affinity beads and eluted with Flag peptides. The elutes were resolved on SDS/PAGE. The protein bands were retrieved and analyzed by mass spectrometry. (B) The list of JMD5-associated proteins.





blot. Fractions of the peak (Superdex 200 26/10 column; PBS solution; flow rate, 1 mL/min) were analyzed by SDS/PAGE gels, followed by Coomassie brilliant blue staining (A–C) or immunoblotting using anti-PKM2 (D). Cyto, cytosolic fraction; NE, nuclear fractions.

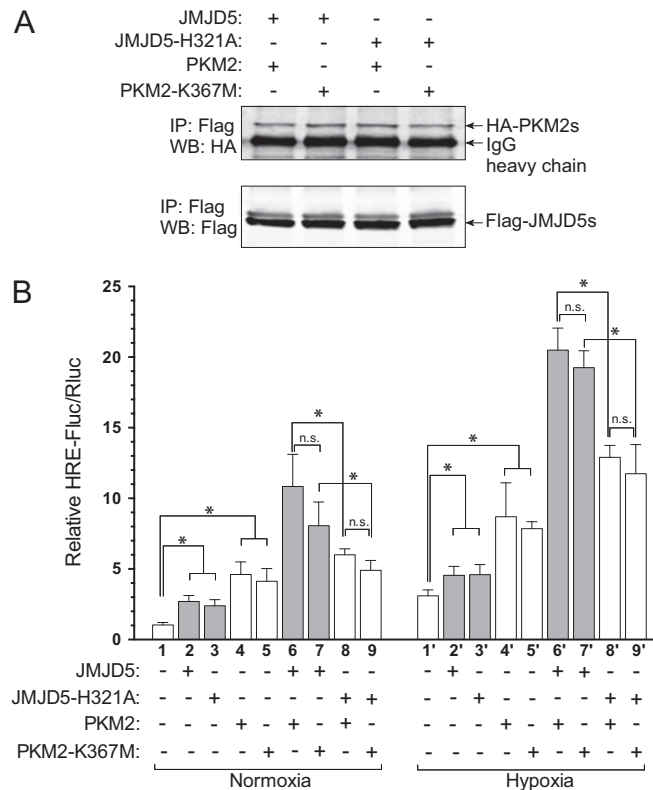

**Fig. S7.** Analysis of catalytically inactive JMJD5's role in HIF-1 $\alpha$  transactivation activity. (A) HEK293T cells were transfected with the vectors as indicated, followed by immunoblotting analysis with anti-HA and anti-Flag, respectively. (B) Transactivation activity of LKO cells cotransfected with pHRE-Fluc, pTK-Rluc, and empty vector or expression vectors (JMJD5, JMJD5-H321A, PKM2, PKM2-K367M) as indicated. The ratio of Fluc:Rluc activity was normalized to LKO with the empty vector at normoxia (mean  $\pm$  SD;  $n = 4$ ). The ratio of Fluc:Rluc activity was normalized to that with the empty vector under normoxia. \* $P < 0.05$ .

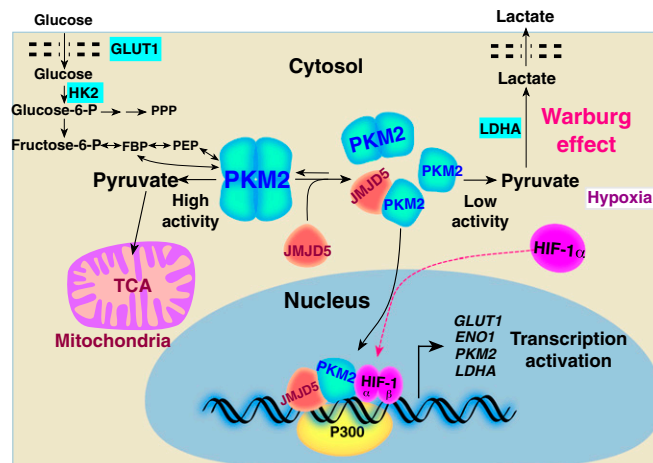

**Fig. S8.** The proposed model that connects JMJD5 and PKM2 in the HIF-1 $\alpha$  system that mediates the Warburg effect.



**Table S1. Primer sequences used for qRT-PCR and ChIP in this study**

| Primer name    | Sequence (5' to 3')                                             | Source     |
|----------------|-----------------------------------------------------------------|------------|
| <b>qRT-PCR</b> |                                                                 |            |
| GLUT1          | Fw: CGGGCAAGAGTGTGCTAAA<br>Rev: TGACGATACCGGAGCCAATG            | Ref. 2     |
| ENO1           | Fw: TCGTCCACTGGCATCTAC<br>Rev: CAGAGCAGGCGCAATAGTTTTA           | This study |
| PKM2           | Fw: TTGAGCTATTGAGGAACCTCCG<br>Rev: CACGATAATGGCCCACTGC          | Ref. 2     |
| LDHA           | Fw: ATCTTGACCTACGTGGCTTGA<br>Rev: CCATACAGGCACACTGGAATCTC       |            |
| PDK1           | Fw: ACCAGGACAGCAATACAAG<br>Rev: CCTCGGTCACCTCATCTTAC            |            |
| MCT4           | Fw: TCACGGGTTTCTCTACGC<br>Rev: GCCAAAGCGTTCCACACAC              | This study |
| HIF-1 $\alpha$ | Fw: CCATTAGAAAAGCAGTTCCGC<br>Rev: TGGGTAGGAGATGGAGATGC          | This study |
| 18S rRNA       | Fw: CGGCGACGACCCATTGGAAC<br>Rev: GAATCGAACCTGATCCCCGTC          | Ref. 2     |
| <b>ChIP</b>    |                                                                 |            |
| LDHA-HRE       | Fw: TTGGAGGGCAGCACCTTACTAGA<br>Rev: GCCTTAAGTGGAAACAGCTATGCTGAC | Ref. 2     |
| PKM2-HRE       | Fw: TTCCTGCCTTTGGTATGAC<br>Rev: CGGCTTGTCCCTCTAC                |            |
| RPL13A-non-HRE | Fw: GAGGCGAGGGTGATAGAG<br>Rev: ACACACAAGGGTCCAATTC              |            |

Fw, forward; Rev, reverse.

**Table S2. Primer sequences used for constructing truncated PKM2 and JMJD5**

| Primer name  | Sequence (5' to 3')                           | RE    | Location* | Source     |
|--------------|-----------------------------------------------|-------|-----------|------------|
| PKM2-HA-F    | Fw: TTTCGGTCCGATGTGGAAGCCCCATAGT              | CpoI  | 85–102    | This study |
| PKM2-R       | Rev: TTTCTCGAGTCACGGCACAGGAACAAC              | XhoI  | 1663–1653 |            |
| PKM2-d55-f   | Fw: TTTCGGTCCGCGATCAGTGGAGACGTTG              | CpoI  | 250–267   |            |
| PKM2-d110-f  | Fw: TTTCGGTCCGGCTCTAGACACTAAAGGAC             | CpoI  | 414–443   |            |
| PKM2-d165-f  | Fw: TTTCGGTCCGAAGGTGGTGGAAAGTGGGC             | CpoI  | 580–597   |            |
| PKM2-d55-r   | Rev: TTTCTCGAGTCAGTCCTTGACAGCACAGG            | XhoI  | 1512–1495 |            |
| PKM2-d110-r  | Rev: TTTCTCGGAGGCCTCCACGGCACC                 | XhoI  | 1344–1326 |            |
| PKM2-d160-r  | Rev: TTTCTCGAGTCAGGCTGTTTCTCCAGACAG           | XhoI  | 1182–1165 |            |
| JMJD5-Flag-F | Fw: TTTGAATTCATGGCTGGAGACACCAC                | EcoRI | 233–250   |            |
| JMJD5-R      | Rev: TTTCTCGAGCTACGACCACCAGAAGCT              | XhoI  | 1483–1466 |            |
| JMJD5-d40-f  | Fw: TTTGAATTCGTGGAGAGGAGCGTGGTG               | EcoRI | 353–370   |            |
| JMJD5-d80-f  | Fw: TTTGAATTCACGGGCACATGGCAGGAC               | EcoRI | 473–490   |            |
| JMJD5-d120-f | Fw: TTTGAATTCGGGTCTGTGACATGGGC                | EcoRI | 593–610   |            |
| JMJD5-d40-r  | Rev: TTTCTCGAGAAACTTGGGGAACCTTTT              | XhoI  | 1360–1343 |            |
| JMJD5-d80-r  | Rev: TTTCTCGAGCTTCTCCCCATCACCTG               | XhoI  | 1340–1223 |            |
| JMJD5-d120-r | Rev: TTTCTCGAGGCTGCAGTAGTCGGGGAT              | XhoI  | 1021–1103 |            |
| PKM-K367M-f  | Fw: GCTGTCTGGAGAAACAGCCATGGGGGACTATCCTCTGGAGG | BamHI | 1080–1117 | Ref. 1     |
| PKM-K367M-r  | Rev: CCTCCAGAGGATAGTCCCCATGGCTGTTTCTCCAGACAGC | XhoI  | 1117–1080 |            |

Fw, forward; RE, restriction enzyme; Rev, reverse.

\*Based on human PKM2 and JMJD5 (GenBank accession nos. NM\_002654 and NP\_001145348, respectively).

1. Yang W, et al. (2011) Nuclear PKM2 regulates  $\beta$ -catenin transactivation upon EGFR activation. *Nature* 480(7375):118–122.
